# Supplementary material for: Chitosan-modified polymeric nanoparticles for the nose-to-brain drug delivery of paroxetine: an in vitro and in vivo evaluation
Source: Royal Society of Chemistry journal article supplement (doi:10.1039/d4nr04250f), 2024-12-06
Supplement: d4nr04250f1.pdf [file d4nr04250f1.pdf]

## Chitosan modified Polymeric Nanoparticles for Nose to Brain Drug Delivery: An *In-vitro* & *In-vivo* Evaluation

Surbhi Sharma<sup>1</sup>, Pammi Gauba<sup>1</sup>, Amit Tyagi<sup>2</sup>, Shweta Dang<sup>\*,1</sup>

<sup>1</sup>*Department of Biotechnology, Jaypee Institute of Information Technology, Noida, UP, INDIA*

<sup>2</sup>*Institute of Nuclear Medicine and Allied Sciences, Defence Research and Development Organisation, Delhi, INDIA*

\* [shweta.dang@jiit.ac.in](mailto:shweta.dang@jiit.ac.in)

**Table S1:** Optimization of Chitosan coated Paroxetine loaded PLGA Nanoparticles on the basis of Entrapment Efficiency percentage developed with different concentrations of chitosan.

**Figure S1:** Results of particle size and zeta potential of PAR-PLGA-NPs (a) Particle size (b) Zeta Potential by Dynamic Light Scattering.

**Figure S2:** Results of particle size and zeta potential of PAR-CS-PLGA-NPs (a) Particle size (b) Zeta Potential by Dynamic Light Scattering.

**Table S1:** Optimization of Chitosan coated Paroxetine loaded PLGA Nanoparticles on the basis of Entrapment Efficiency percentage developed with different concentrations of chitosan.

| Drug: Polymer Ratio | Poloxamer (w/v) | Chitosan (w/v) | Entrapment Efficiency (%) | Drug Loading (%) |
|---------------------|-----------------|----------------|---------------------------|------------------|
| 1:10                | 1%              | 0.25%          | 77.78±2.87                | 8.89±1.4         |
|                     |                 | 0.5%           | 87.5±1.87                 | 13.4±1.3         |
|                     |                 | 1%             | Precipitation             |                  |

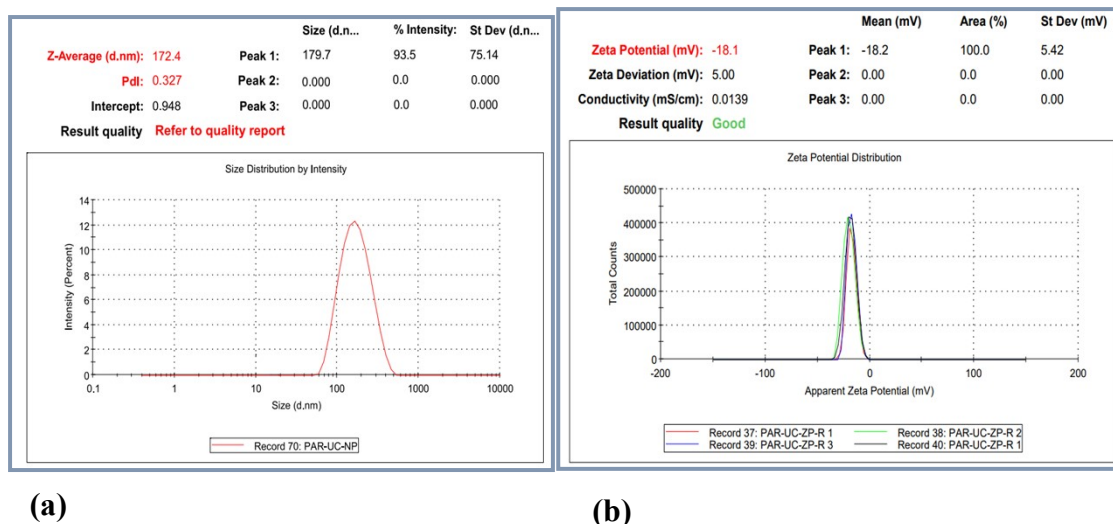

**Fig S1:** Results of particle size and zeta potential of PAR-PLGA-NPs (a) Particle size (b) Zeta Potential by Dynamic Light Scattering.

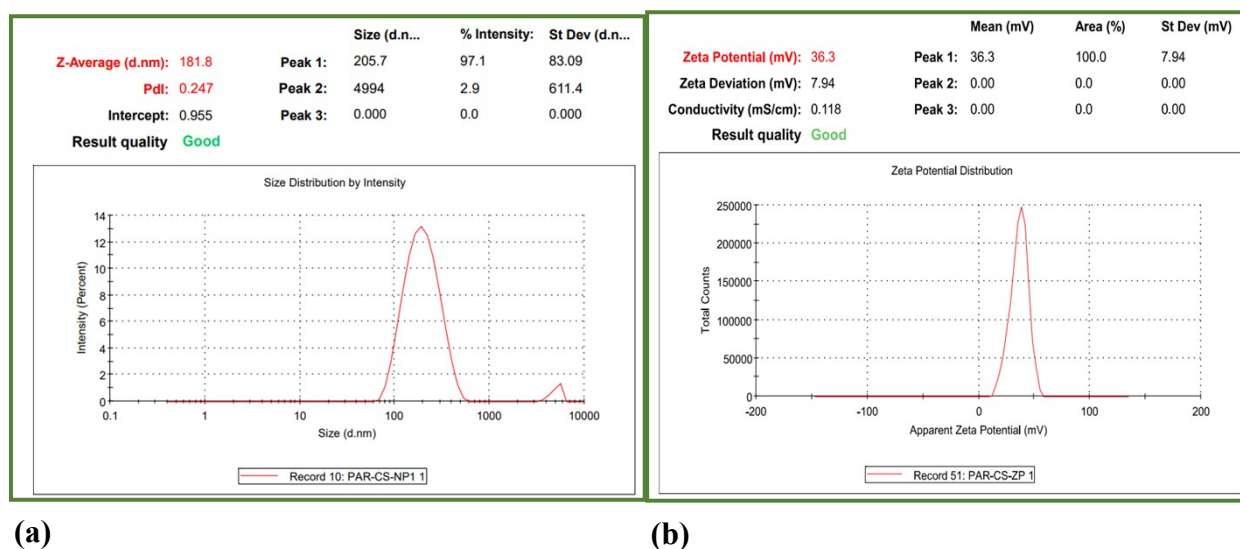

**Fig S2:** Results of particle size and zeta potential of PAR-CS-PLGA-NPs (a) Particle size (b) Zeta Potential by Dynamic Light Scattering.
